# Supplementary material for: Molecular dynamics study on the inhibition mechanisms of ReACp53 peptide for p53–R175H mutant aggregation
Source: Royal Society of Chemistry journal article supplement (doi:10.1039/d1cp03094a), 2021-01-01
Supplement: d1cp03094a1.pdf [file d1cp03094a1.pdf]

Molecular dynamics study on the inhibition mechanisms of ReACp53 peptide for p53-R175H mutant aggregation

Jiangtao Lei<sup>a\*</sup>, Mengqiang Cai<sup>a</sup>, Yun Shen<sup>b</sup>, Dongdong Lin<sup>c</sup> and Xiaohua Deng<sup>a\*</sup>

<sup>a</sup> Institute of Space Science and Technology, Nanchang University, Xuefu Avenue 999, Nanchang City 330031, China

<sup>b</sup> Department of Physics, School of Sciences, Nanchang University, Xuefu Avenue 999, Nanchang City 330031, China

<sup>c</sup> Department of Physics and Qian Xuesen Collaborative Research Center of Astrochemistry and Space Life Sciences, Ningbo University, Ningbo, Zhejiang, China.

The authors declare no competing financial interest.

\*Corresponding author: Jiangtao Lei, E-mail: jiangtaolei@ncu.edu.cn; Xiaohua Deng, E-mail: xh.deng@hotmail.com;

**This material contains eight supplemental figures and one supplemental table.**

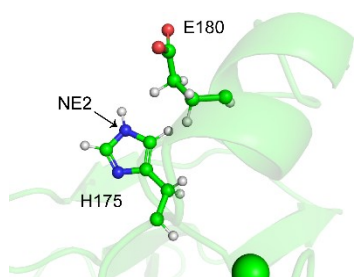

Fig. S1 The protonation state of R175H mutation in p53C.

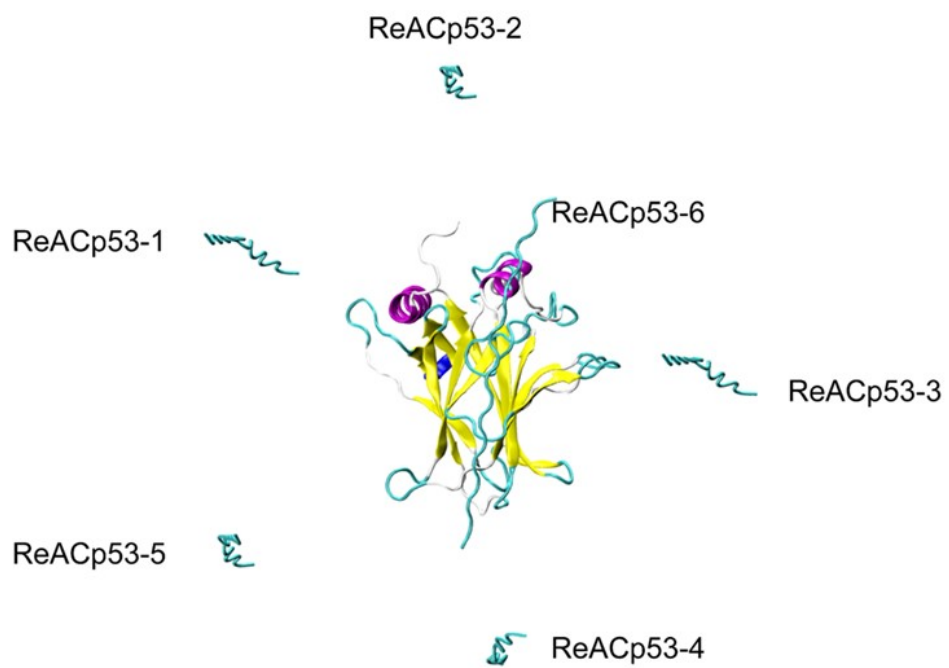

Fig. S2 The six different initial coordinates of R175H mutant with ReACp53 for 6 MDs.

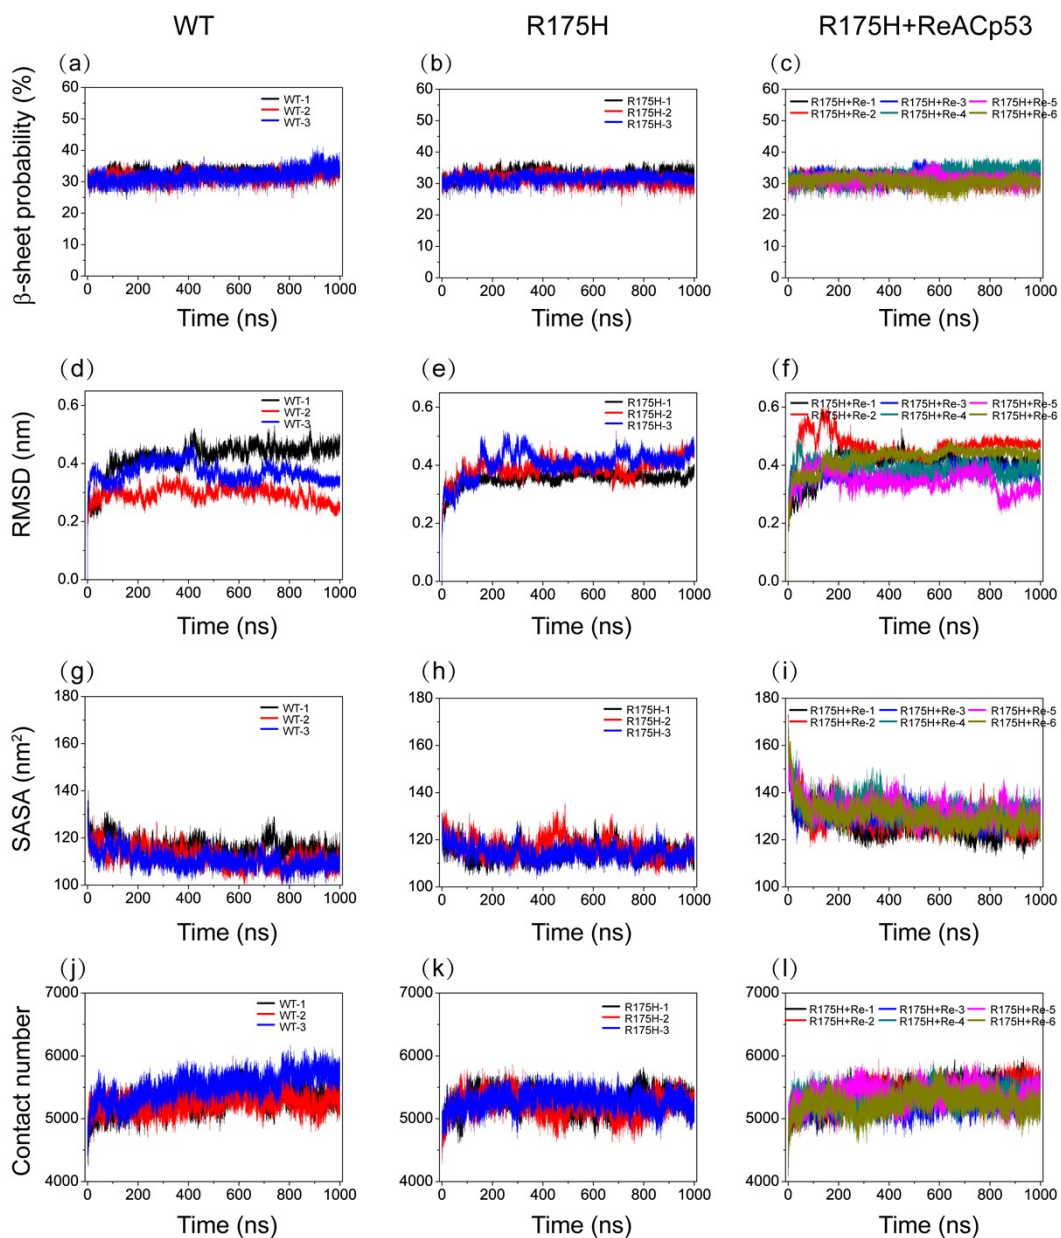

Fig. S3 The convergence analysis of WT, R175H and R175H+ReACp53 systems. Time evolution of the  $\beta$ -sheet probability (a-c),  $C\alpha$ -root-mean-square-deviation ( $C\alpha$ -RMSD) (d-f), the solvent accessible surface area (SASA) (g-i) and contact number of whole p53 protein (j-l).

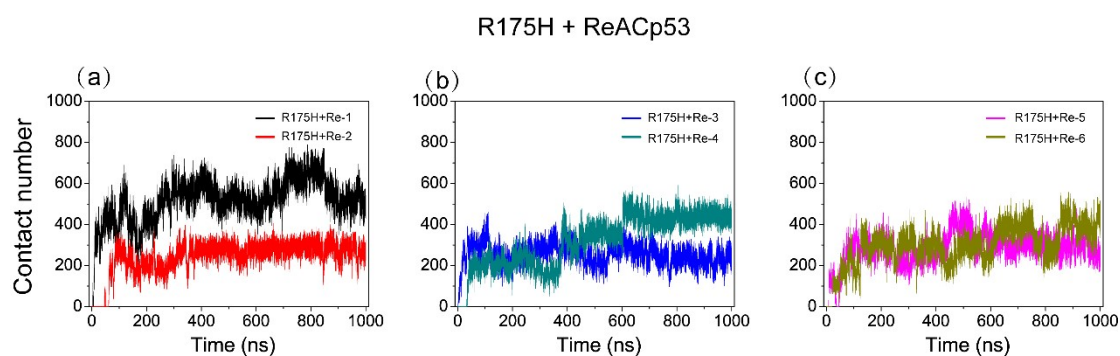

Fig. S4 Time evolution of the contact number between the R175H mutant and ReAcP53.

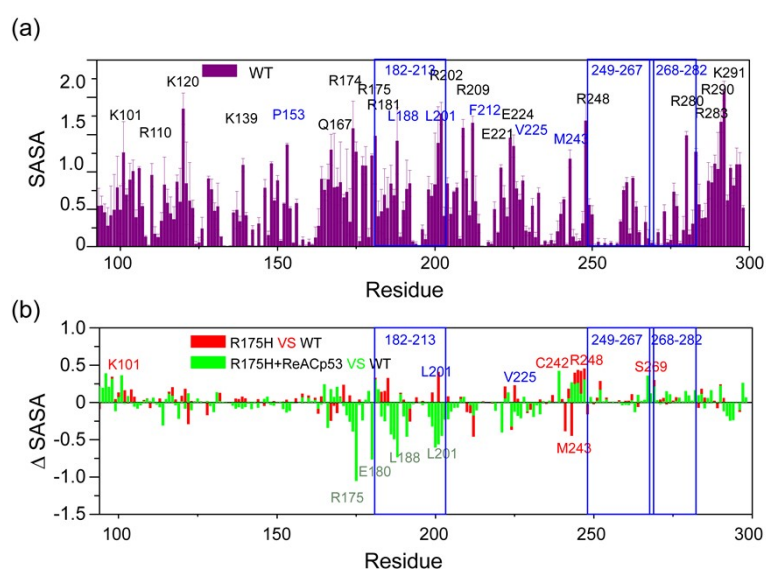

Fig. S5 (a) The solvent accessible surface area (SASA) of each residue in the WT system. (d) The difference value of SASA between R175H mutant (with or without ReAcP53) and WT p53C.

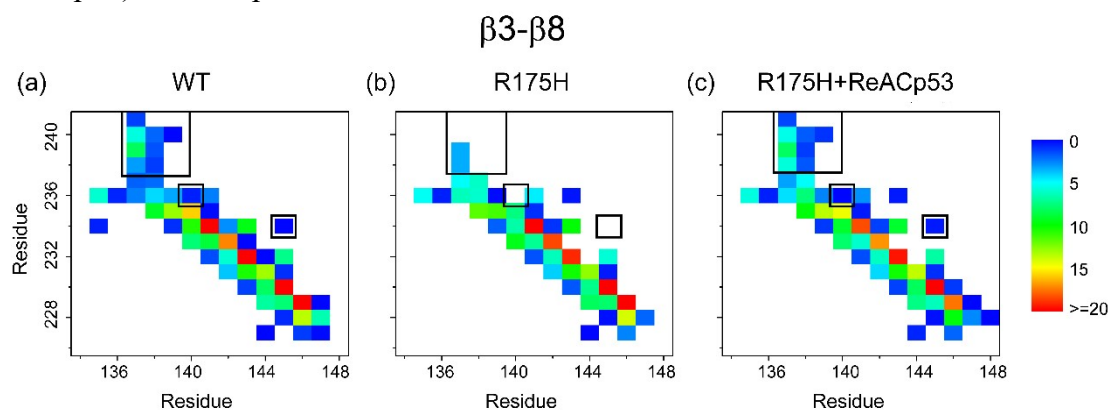

Fig. S6 The maps of contact number between  $\beta$ 3 and  $\beta$ 8 in the WT (a), R175H (b) and R175H+ReAcP53 (c) systems.

### $\beta 4$ - $\beta 7$

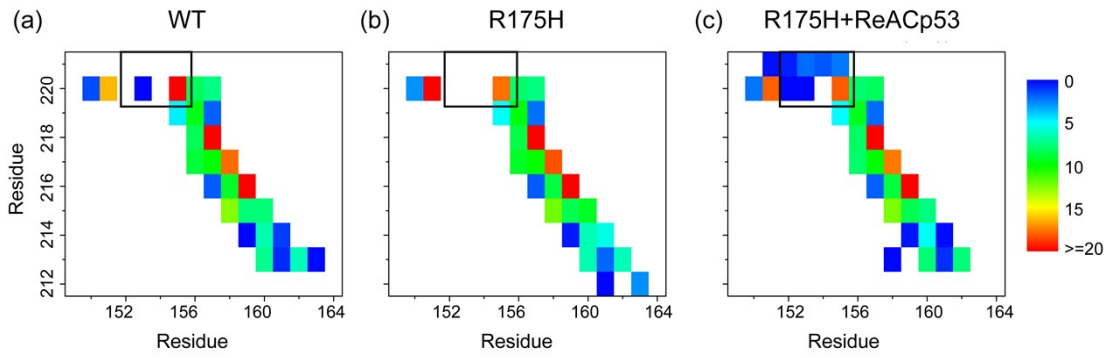

Fig. S7 The maps of contact number between  $\beta 4$  and  $\beta 7$  in the WT (a), R175H (b) and R175H+ReACp53 (c) systems.

### $\beta 6$ - $\beta 7$

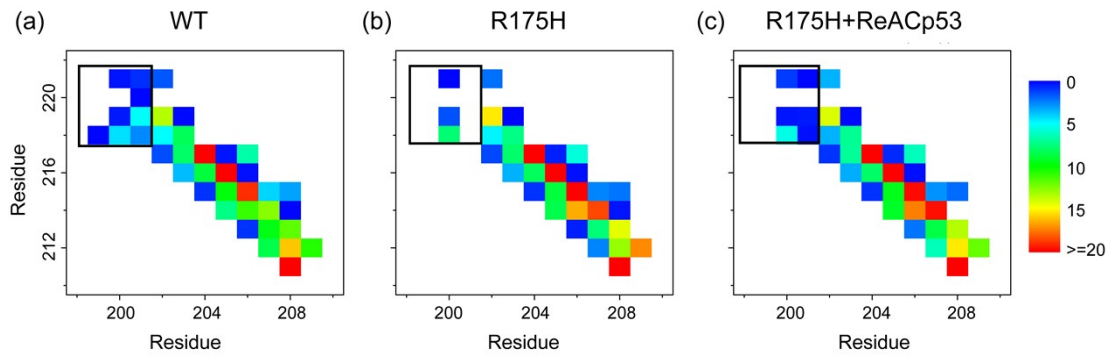

Fig. S8 The maps of contact number between  $\beta 6$  and  $\beta 7$  in the WT (a), R175H (b) and R175H+ReACp53 (c) systems.

| Salt bridge | Location                                        | WT (%) | R175H (%) | R175H+ReACp53 (%) |
|-------------|-------------------------------------------------|--------|-----------|-------------------|
| K132-E271   | $\beta 2'$ - $\beta 10$                         | 74.8   | 66.0      | 68.9              |
| K132-E285   | $\beta 2'$ -H2                                  | 94.3   | 83.1      | 93.0              |
| R156-E204   | $\beta 4$ - $\beta 6$                           | 13.4   | 18.4      | 6.7               |
| R156-D258   | $\beta 4$ - $\beta 9$                           | 64.9   | 58.5      | 64.8              |
| R158-D208   | $\beta 4$ - $\beta 6$                           | 12.8   | 17.6      | 13.6              |
| R158-D258   | $\beta 4$ - $\beta 9$                           | 99.9   | 99.9      | 97.4              |
| K164-E271   | $\beta 4$ - $\beta 10$                          | 80.4   | 92.8      | 96.1              |
| R174-E171   | L2-L2                                           | 36.1   | 18.0      | 1.2               |
| R175-E180   | L2-L2                                           | 44.3   | 0         | 0                 |
| R175-D184   | L2-L2                                           | 18.5   | 0         | 0                 |
| R175-D186   | L2-L2                                           | 26.4   | 0         | 0                 |
| R181-E180   | L2-L2                                           | 17.7   | 25.9      | 16.2              |
| R196-D184   | L2-L2                                           | 43.6   | 21.6      | 36.6              |
| R196-D186   | L2-L2                                           | 23.0   | 31.3      | 26.5              |
| R196-E198   | $\beta 5$ - $\beta 5$                           | 44.6   | 38.5      | 28.7              |
| R202-E204   | L( $\beta 5\beta 6$ )- $\beta 6$                | 23.8   | 7.2       | 2.3               |
| R202-E221   | L( $\beta 5\beta 6$ )-<br>L( $\beta 7\beta 8$ ) | 15.3   | 18.6      | 33.7              |
| R249-E171   | L3-L2                                           | 60.2   | 39.1      | 72.3              |
| R273-D281   | $\beta 10$ -H2                                  | 50.7   | 58.3      | 40.0              |
| R273-E285   | $\beta 10$ -H2                                  | 48.1   | 64.7      | 57.4              |
| R280-D281   | H2-H2                                           | 33.3   | 34.5      | 51.3              |
| R282-E286   | H2-H2                                           | 99.7   | 99.5      | 99.6              |
| R283-E287   | H2-H2                                           | 65.8   | 62.6      | 69.9              |
| R290-D281   | H2-H2                                           | 33.3   | 0         | 16.7              |
| R290-E285   | H2-H2                                           | 38.9   | 2.1       | 39.4              |
| R290-E287   | H2-H2                                           | 27.1   | 2.5       | 4.8               |

Table. S1 The probabilities of salt bridge pairs in p53C for WT, R175H and R175H+ReACp53.
